# Supplementary material for: Rhodium-catalyzed isomerization of unactivated alkynes to 1,3-dienes
Source: Royal Society of Chemistry journal article supplement (doi:10.1039/b605368h), 2006-01-01
Supplement: b605368h.pdf [file b605368h.pdf]

# Rhodium-Catalyzed Isomerization of Unactivated Alkynes to 1,3-Dienes

Ryo Shintani, Wei-Liang Duan, Soyoung Park, and Tamio Hayashi\*

Department of Chemistry, Graduate School of Science, Kyoto University,  
Sakyo, Kyoto 606-8502, Japan

## Supporting Information

### I. General

All air- and moisture-sensitive manipulations were carried out with standard Schlenk techniques under nitrogen or in a glove box under argon.

Et<sub>2</sub>O and THF were purified by passing through a neutral alumina column under nitrogen. DMF and 1,2-dichloroethane were distilled over CaH<sub>2</sub> under vacuum.

Dimethyl allylmalonate (Aldrich), methyl 2-oxocyclopentanecarboxylate (Aldrich), dimethyl methylmalonate (Aldrich), benzyl bromide (Nacalai Tesque), 1-bromo-2-pentyne (Wako Chemicals), iodoethane (TCI), 1-phenyl-1-hexyne (TCI), LiAlH<sub>4</sub> (Wako Chemicals), NaH (Kanto Chemicals; 60 wt% in mineral oil), and *n*-BuLi (Kanto Chemicals; 1.59 M solution in hexane) were used as received.

Dimethyl methyl(2-pentynyl)malonate (**1a**),<sup>1</sup> methyl 5,5-bis(methoxycarbonyl)-2-decen-7-ynoate (**1j**),<sup>1</sup> *tert*-butyl 4-ethynylpiperidine-1-carboxylate,<sup>2</sup> 1-benzylidene-3-oxopyrazolidin-1-ium-2-ide (**3**),<sup>3</sup> 2-hexyn-1-yl *p*-toluenesulfonate,<sup>4</sup> [RhCl(cod)]<sub>2</sub>,<sup>5</sup> RhH(PPh<sub>3</sub>)<sub>4</sub>,<sup>6</sup> and (±)-binap<sup>7</sup> were synthesized following the literature procedures.

All other chemicals and solvents were purchased from Aldrich, Wako Chemicals, TCI, or Kanto Chemicals and used as received.

<sup>1</sup> Shintani, R.; Tsurusaki, A.; Okamoto, K.; Hayashi, T. *Angew. Chem. Int. Ed.* **2005**, *44*, 3909.

<sup>2</sup> Raimundo, B. C.; Oslob, J. D.; Braisted, A. C.; Hyde, J.; McDowell, R. S.; Randal, M.; Waal, N. D.; Wilkinson, J.; Yu, C. H.; Arkin, M. R. *J. Med. Chem.* **2004**, *47*, 3111.

<sup>3</sup> Shintani, R.; Fu, G. C. *J. Am. Chem. Soc.* **2003**, *125*, 10778.

<sup>4</sup> Yoshida, Y.; Sakakura, Y.; Aso, N.; Okada, S.; Tanabe, Y. *Tetrahedron* **1999**, *55*, 2183.

<sup>5</sup> Giordano, G.; Crabtree, R. H. *Inorg. Synth.* **1979**, *19*, 218.

<sup>6</sup> Ahmad, N.; Levison, J. J.; Robinson, S. D.; Uttley, M. F. *Inorg. Synth.* **1974**, *15*, 58.

<sup>7</sup> Cai, D.; Payack, J. F.; Bender, D. R.; Hughes, D. L.; Verhoeven, T. R.; Reider, P. J. *J. Org. Chem.* **1994**, *59*, 7180.

## II. Synthesis of Substrates

The yields have not been optimized.

### 6,6-bis(benzyloxymethyl)-3-pentyne (**1b**)

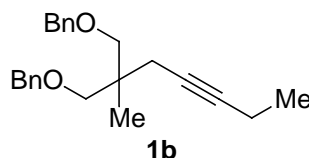

A solution of dimethyl methyl(2-pentynyl)malonate (**1a**; 1.06 g, 4.99 mmol) in Et<sub>2</sub>O (8 mL) was added to a suspension of LiAlH<sub>4</sub> (378 mg, 9.96 mmol) in Et<sub>2</sub>O (12 mL) at 0 °C. The mixture was stirred for 9 h at room temperature and the reaction was quenched with water. The precipitate was removed by filtration, and the remaining solution was dried over MgSO<sub>4</sub>, filtered, and concentrated under vacuum to afford diol as a colorless oil (775 mg, 4.96 mmol; 99% yield).

A solution of this diol in THF (10 mL) was added to a suspension of NaH (602 mg, 15.1 mmol; 60 wt% in mineral oil) in THF (15 mL)/DMF (3 mL) at 0 °C. The resulting mixture was stirred for 30 min at 0 °C and benzyl bromide (1.31 mL, 11.0 mmol) was then added to it. After stirring for 12 h at room temperature, the reaction was quenched with water and extracted with Et<sub>2</sub>O. The organic layer was washed with NaCl (saturated, aqueous), dried over MgSO<sub>4</sub>, filtered, and concentrated under vacuum. The residue was chromatographed on silica gel with Et<sub>2</sub>O/hexane = 1/30 to afford **1b** as a colorless oil (983 mg, 2.92 mmol; 59% yield).

<sup>1</sup>H NMR (CDCl<sub>3</sub>): δ 7.37-7.31 (m, 8H), 7.29-7.25 (m, 2H), 4.52 (s, 4H), 3.40 (d, <sup>2</sup>J<sub>HH</sub> = 8.8 Hz, 2H), 3.36 (d, <sup>2</sup>J<sub>HH</sub> = 8.9 Hz, 2H), 2.25 (t, <sup>5</sup>J<sub>HH</sub> = 2.2 Hz, 2H), 2.14 (qt, <sup>3</sup>J<sub>HH</sub> = 7.5 Hz and <sup>5</sup>J<sub>HH</sub> = 2.4 Hz, 2H), 1.10 (t, <sup>3</sup>J<sub>HH</sub> = 7.4 Hz, 3H), 1.03 (s, 3H). <sup>13</sup>C NMR (CDCl<sub>3</sub>): δ 139.2, 128.4, 127.52, 127.50, 83.7, 76.5, 74.5, 73.5, 39.6, 25.2, 19.7, 14.6, 12.7. HRMS (ESI) calcd for C<sub>23</sub>H<sub>29</sub>O<sub>2</sub> (M+H<sup>+</sup>) 337.2162, found 337.2166.

### Dimethyl allyl(2-pentynyl)malonate (**1c**) (CAS 191801-56-6)

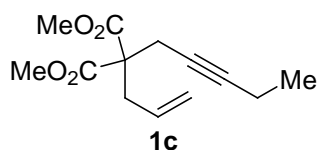

Dimethyl allylmalonate (804 μL, 5.00 mmol) was added dropwise to a suspension

of NaH (240 mg, 6.00 mmol; 60 wt% in mineral oil) in THF (15 mL) at 0 °C. The resulting mixture was stirred for 20 min at 0 °C and 1-bromo-2-pentyne (639  $\mu$ L, 6.25 mmol) was then added to it. After stirring for 11 h at room temperature, the reaction was quenched with water and extracted with Et<sub>2</sub>O. The organic layer was washed with NaCl (saturated, aqueous), dried over MgSO<sub>4</sub>, filtered, and concentrated under vacuum. The residue was chromatographed on silica gel with Et<sub>2</sub>O/hexane = 1/6 to afford **1c** as a pale yellow oil (1.17 g, 4.89 mmol; 98% yield).

<sup>1</sup>H NMR (CDCl<sub>3</sub>):  $\delta$  5.62 (ddt, <sup>3</sup>J<sub>HH</sub> = 17.1, 9.7, and 7.5 Hz, 1H), 5.15 (d, <sup>3</sup>J<sub>HH</sub> = 17.0 Hz, 1H), 5.10 (d, <sup>3</sup>J<sub>HH</sub> = 10.0 Hz, 1H), 3.72 (s, 6H), 2.78 (d, <sup>3</sup>J<sub>HH</sub> = 7.4 Hz, 2H), 2.74 (s, 2H), 2.12 (q, <sup>3</sup>J<sub>HH</sub> = 7.4 Hz, 2H), 1.08 (t, <sup>3</sup>J<sub>HH</sub> = 7.4 Hz, 3H). <sup>13</sup>C NMR (CDCl<sub>3</sub>):  $\delta$  170.7, 132.2, 119.7, 85.3, 73.7, 57.5, 52.8, 36.8, 23.2, 14.4, 12.5.

**Methyl 2-oxo-1-(2-pentynyl)cyclopentanecarboxylate (1d)** (CAS 68480-23-9)

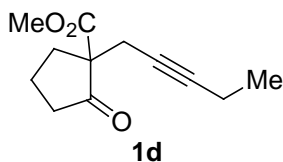

Methyl 2-oxocyclopentanecarboxylate (621  $\mu$ L, 5.00 mmol) was added dropwise to a suspension of NaH (240 mg, 6.00 mmol; 60 wt% in mineral oil) in THF (15 mL) at 0 °C. The resulting mixture was stirred for 12 min at 0 °C and 1-bromo-2-pentyne (639  $\mu$ L, 6.25 mmol) was then added to it. After stirring for 2 h at room temperature, the reaction was quenched with water and extracted with Et<sub>2</sub>O. The organic layer was washed with NaCl (saturated, aqueous), dried over MgSO<sub>4</sub>, filtered, and concentrated under vacuum. The residue was chromatographed on silica gel with Et<sub>2</sub>O/hexane = 1/4 to afford **1d** as a yellow oil (654 mg, 3.14 mmol; 63% yield).

<sup>1</sup>H NMR (CDCl<sub>3</sub>):  $\delta$  3.70 (s, 3H), 2.68 (t, <sup>5</sup>J<sub>HH</sub> = 2.3 Hz, 2H), 2.50-2.43 (m, 2H), 2.34-2.23 (m, 2H), 2.12 (qt, <sup>3</sup>J<sub>HH</sub> = 7.5 Hz and <sup>5</sup>J<sub>HH</sub> = 2.4 Hz, 2H), 2.08-2.02 (m, 2H), 1.08 (t, <sup>3</sup>J<sub>HH</sub> = 7.4 Hz, 3H). <sup>13</sup>C NMR (CDCl<sub>3</sub>):  $\delta$  214.3, 171.3, 84.5, 74.7, 59.4, 52.9, 38.7, 32.7, 23.9, 20.0, 14.3, 12.5.

***tert*-Butyl 4-(1-butynyl)piperidine-1-carboxylate (1e)**

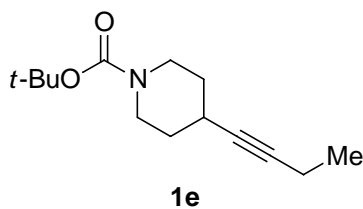

*n*-BuLi (1.89 mL, 3.01 mmol; 1.59 M solution in hexane) was added to a solution of *tert*-butyl 4-ethynylpiperidine-1-carboxylate (628 mg, 3.00 mmol) in THF (10 mL) at  $-78^{\circ}\text{C}$ . The resulting mixture was stirred for 25 min at  $-78$  to  $-55^{\circ}\text{C}$  and iodoethane (360  $\mu\text{L}$ , 4.50 mmol) was then added to it. After stirring for 19 h at  $50^{\circ}\text{C}$ , the reaction was diluted with NaCl (aqueous) and extracted with  $\text{Et}_2\text{O}$ . The organic layer was dried over  $\text{MgSO}_4$ , filtered, and concentrated under vacuum. The residue was chromatographed on silica gel with  $\text{Et}_2\text{O}$ /hexane = 1/4 to afford **1e** as a colorless oil (712 mg, 3.00 mmol; 100% yield).

$^1\text{H}$  NMR ( $\text{CDCl}_3$ ):  $\delta$  3.67 (ddd,  $^2J_{\text{HH}} = 13.3$  Hz and  $^3J_{\text{HH}} = 6.7$  and  $3.8$  Hz, 2H), 3.15 (ddd,  $^2J_{\text{HH}} = 13.2$  Hz and  $^3J_{\text{HH}} = 8.5$  and  $3.4$  Hz, 2H), 2.55-2.49 (m, 1H), 2.16 (qd,  $^3J_{\text{HH}} = 7.4$  Hz and  $^5J_{\text{HH}} = 2.1$  Hz, 2H), 1.73 (ddt,  $^2J_{\text{HH}} = 13.2$  Hz and  $^3J_{\text{HH}} = 6.8$  and  $3.7$  Hz, 2H), 1.51 (dtd,  $^2J_{\text{HH}} = 13.1$  Hz and  $^3J_{\text{HH}} = 8.3$  and  $3.5$  Hz, 2H), 1.45 (s, 9H), 1.11 (t,  $^3J_{\text{HH}} = 7.6$  Hz, 3H).  $^{13}\text{C}$  NMR ( $\text{CDCl}_3$ ):  $\delta$  155.0, 83.3, 81.7, 79.5, 42.5, 32.0, 28.7, 27.2, 14.6, 12.6. HRMS (ESI) calcd for  $\text{C}_{14}\text{H}_{23}\text{NO}_2\text{Na}$  ( $\text{M}+\text{Na}^+$ ) 260.1621, found 260.1609.

### Dimethyl methyl(2-hexynyl)malonate (**1g**)

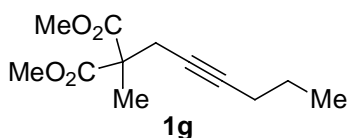

Dimethyl methylmalonate (320  $\mu\text{L}$ , 2.40 mmol) was added dropwise to a suspension of NaH (106 mg, 2.65 mmol; 60 wt% in mineral oil) in THF (5 mL) at  $0^{\circ}\text{C}$ . The resulting mixture was stirred for 25 min at  $0^{\circ}\text{C}$  and 2-hexyn-1-yl *p*-toluenesulfonate (908 mg, 3.60 mmol) was then added to it. After stirring for 12 h at room temperature, the reaction was quenched with water and extracted with  $\text{Et}_2\text{O}$ . The organic layer was washed with NaCl (saturated, aqueous), dried over  $\text{MgSO}_4$ , filtered, and concentrated under vacuum. The residue was chromatographed on silica gel with  $\text{CH}_2\text{Cl}_2$ /hexane = 2/1 to afford **1g** as a colorless oil (333 mg, 1.47 mmol; 61% yield).

$^1\text{H}$  NMR ( $\text{CDCl}_3$ ):  $\delta$  3.72 (s, 6H), 2.75 (t,  $^5J_{\text{HH}} = 2.4$  Hz, 2H), 2.09 (tt,  $^3J_{\text{HH}} = 7.0$  Hz

and  $^5J_{\text{HH}} = 2.4$  Hz, 2H), 1.53 (s, 3H), 1.47 (sextet,  $^3J_{\text{HH}} = 7.2$  Hz, 2H), 0.94 (t,  $^3J_{\text{HH}} = 7.3$  Hz, 3H).  $^{13}\text{C}$  NMR ( $\text{CDCl}_3$ ):  $\delta$  171.8, 83.6, 74.9, 53.8, 52.9, 26.5, 22.5, 20.8, 20.1, 13.5. HRMS (ESI) calcd for  $\text{C}_{12}\text{H}_{18}\text{O}_4\text{Na}$  ( $\text{M}+\text{Na}^+$ ) 249.1097, found 249.1108.

### Dimethyl methyl(6-methyl-2-heptynyl)malonate (**1h**)

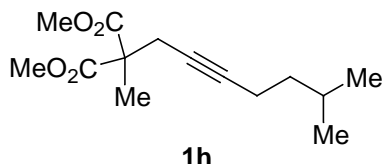

This was synthesized following the procedure for compound **1g**. Colorless oil, 74% yield.

$^1\text{H}$  NMR ( $\text{CDCl}_3$ ):  $\delta$  3.73 (s, 6H), 2.75 (t,  $^5J_{\text{HH}} = 2.4$  Hz, 2H), 2.12 (tt,  $^3J_{\text{HH}} = 7.4$  Hz and  $^5J_{\text{HH}} = 2.4$  Hz, 2H), 1.70-1.59 (m, 1H), 1.53 (s, 3H), 1.34 (q,  $^3J_{\text{HH}} = 7.2$  Hz, 2H), 0.87 (d,  $^3J_{\text{HH}} = 6.6$  Hz, 6H).  $^{13}\text{C}$  NMR ( $\text{CDCl}_3$ ):  $\delta$  171.6, 83.5, 74.4, 53.6, 52.7, 37.8, 27.1, 26.3, 22.1, 19.9, 16.6. HRMS (ESI) calcd for  $\text{C}_{14}\text{H}_{22}\text{O}_4\text{Na}$  ( $\text{M}+\text{Na}^+$ ) 277.1410, found 277.1411.

### Dimethyl methyl(5-phenyl-2-pentynyl)malonate (**1i**)

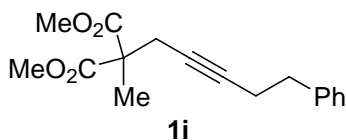

This was synthesized following the procedure for compound **1g**. Colorless oil, 100% yield.

$^1\text{H}$  NMR ( $\text{CDCl}_3$ ):  $\delta$  7.30-7.27 (m, 2H), 7.21-7.18 (m, 3H), 3.72 (s, 6H), 2.77 (t,  $^3J_{\text{HH}} = 7.6$  Hz, 2H), 2.75 (t,  $^5J_{\text{HH}} = 2.3$  Hz, 2H), 2.43 (tt,  $^3J_{\text{HH}} = 7.5$  Hz and  $^5J_{\text{HH}} = 2.3$  Hz, 2H), 1.49 (s, 3H).  $^{13}\text{C}$  NMR ( $\text{CDCl}_3$ ):  $\delta$  171.8, 140.9, 128.6, 128.5, 126.4, 82.9, 75.6, 53.7, 52.9, 35.5, 26.5, 21.0, 20.1. HRMS (ESI) calcd for  $\text{C}_{17}\text{H}_{21}\text{O}_4$  ( $\text{M}+\text{H}^+$ ) 289.1434, found 289.1429.

## III. Catalytic Reactions

### General Procedure for Equation 2 and Table 1.

A solution of  $[\text{RhCl}(\text{cod})]_2$  (2.5 mg, 10  $\mu\text{mol}$  Rh) and ( $\pm$ )-binap (6.8 mg, 11  $\mu\text{mol}$ )

in 1,2-dichloroethane (0.3 mL) was stirred for 5 min at room temperature. Dipole **3** (34.8 mg, 0.20 mmol) and alkyne **1** (0.20 mmol) were added to it with additional 1,2-dichloroethane (0.3 mL), and the mixture was stirred for 24–72 h at 80–100 °C. After cooled to room temperature, the reaction mixture was directly passed through a pad of silica gel with EtOAc, and the solvent was removed under vacuum. The residue was purified by silica gel preparative TLC with Et<sub>2</sub>O/hexane to afford compound **2**.

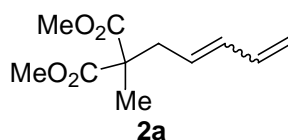

**Equation 1.** (CAS 148876-15-7 for *E*; 148876-25-9 for *Z*) The reaction was conducted for 24 h at 80 °C. Colorless oil. 89% yield, *E/Z* = 77/23.

*E*-isomer: <sup>1</sup>H NMR (CDCl<sub>3</sub>): δ 6.27 (dt, <sup>3</sup>*J*<sub>HH</sub> = 17.0 and 10.3 Hz, 1H), 6.08 (dd, <sup>3</sup>*J*<sub>HH</sub> = 15.0 and 10.5 Hz, 1H), 5.54 (dt, <sup>3</sup>*J*<sub>HH</sub> = 15.1 and 7.6 Hz, 1H), 5.12 (d, <sup>3</sup>*J*<sub>HH</sub> = 16.7 Hz, 1H), 5.01 (d, <sup>3</sup>*J*<sub>HH</sub> = 10.1 Hz, 1H), 3.71 (s, 6H), 2.63 (d, <sup>3</sup>*J*<sub>HH</sub> = 7.4 Hz, 2H), 1.39 (s, 3H). <sup>13</sup>C NMR (CDCl<sub>3</sub>): δ 172.2, 136.5, 135.1, 128.1, 116.4, 53.8, 52.5, 38.9, 19.9.

*Z*-isomer: <sup>1</sup>H NMR (CDCl<sub>3</sub>): δ 6.61 (dt, <sup>3</sup>*J*<sub>HH</sub> = 16.8 and 10.7 Hz, 1H), 6.12 (t, <sup>3</sup>*J*<sub>HH</sub> = 11.0 Hz, 1H), 5.32 (dt, <sup>3</sup>*J*<sub>HH</sub> = 10.1 and 8.2 Hz, 1H), 5.22 (d, <sup>3</sup>*J*<sub>HH</sub> = 16.9 Hz, 1H), 5.14 (d, <sup>3</sup>*J*<sub>HH</sub> = 10.7 Hz, 1H), 3.70 (s, 6H), 2.76 (d, <sup>3</sup>*J*<sub>HH</sub> = 7.9 Hz, 2H), 1.40 (s, 3H). <sup>13</sup>C NMR (CDCl<sub>3</sub>): δ 172.2, 132.9, 131.6, 125.2, 118.5, 53.7, 52.5, 33.6, 19.8.

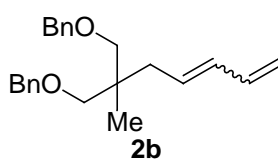

**Table 1, Entry 1.** The reaction was conducted for 48 h at 80 °C in the presence of 7 mol% catalyst. Colorless oil. 76% yield, *E/Z* = 73/27.

<sup>1</sup>H NMR (CDCl<sub>3</sub>): δ 7.37-7.27 (m, 10H), 6.69 (dt, <sup>3</sup>*J*<sub>HH</sub> = 16.8 and 10.6 Hz, 0.27H), 6.28 (dt, <sup>3</sup>*J*<sub>HH</sub> = 17.0 and 10.2 Hz, 0.73H), 6.10 (t, <sup>3</sup>*J*<sub>HH</sub> = 11.0 Hz, 0.27H), 6.04 (dd, <sup>3</sup>*J*<sub>HH</sub> = 15.1 and 10.3 Hz, 0.73H), 5.65 (dt, <sup>3</sup>*J*<sub>HH</sub> = 15.0 and 7.8 Hz, 0.73H), 5.47 (dt, <sup>3</sup>*J*<sub>HH</sub> = 10.1 and 8.9 Hz, 0.27H), 5.18 (dd, <sup>3</sup>*J*<sub>HH</sub> = 17.0 Hz and <sup>2</sup>*J*<sub>HH</sub> = 2.1 Hz, 0.27H), 5.08 (dd, <sup>3</sup>*J*<sub>HH</sub> = 16.9 Hz, <sup>2</sup>*J*<sub>HH</sub> = 1.4 Hz, 0.73H), 5.06 (d, <sup>3</sup>*J*<sub>HH</sub> = 10.0 Hz, 0.27H), 4.96 (dd, <sup>3</sup>*J*<sub>HH</sub> = 10.2 Hz, <sup>2</sup>*J*<sub>HH</sub> = 1.3 Hz, 0.73H), 4.49 (s, 2.92H), 4.48 (s, 1.08H), 3.31 (d, <sup>2</sup>*J*<sub>HH</sub> = 8.8 Hz,

0.54H), 3.30 (d,  $^2J_{\text{HH}} = 8.8$  Hz, 1.46H), 3.29 (d,  $^2J_{\text{HH}} = 8.7$  Hz, 0.54H), 3.28 (d,  $^2J_{\text{HH}} = 8.8$  Hz, 1.46H), 2.27 (d,  $^3J_{\text{HH}} = 8.1$  Hz, 0.54H), 2.14 (d,  $^3J_{\text{HH}} = 7.8$  Hz, 1.46H), 0.94 (s, 0.81H), 0.92 (s, 2.19H).  $^{13}\text{C}$  NMR ( $\text{CDCl}_3$ ):  $\delta$  138.9, 137.2, 133.7, 132.5, 131.6, 131.0, 128.4, 128.21, 128.20, 127.7, 127.31, 127.30, 127.29, 127.26, 116.7, 114.9, 74.7, 74.6, 73.2, 73.1, 39.9, 39.7, 38.0, 32.5, 19.6, 19.5. HRMS (ESI) calcd for  $\text{C}_{23}\text{H}_{29}\text{O}_2$  ( $\text{M}+\text{H}^+$ ) 337.2162, found 337.2162.

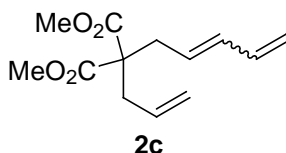

**Table 1, Entry 2.** (CAS 355114-57-7 for *E*) The reaction was conducted for 24 h at 80 °C. Colorless oil. 84% yield, *E/Z* = 69/31.

$^1\text{H}$  NMR ( $\text{CDCl}_3$ ):  $\delta$  6.59 (dt,  $^3J_{\text{HH}} = 16.7$  and 10.8 Hz, 0.31H), 6.27 (dt,  $^3J_{\text{HH}} = 16.9$  and 10.3 Hz, 0.69H), 6.13-6.05 (m, 1H), 5.68-5.59 (m, 1H), 5.50 (dt,  $^3J_{\text{HH}} = 15.0$  and 7.6 Hz, 0.69H), 5.28 (dt,  $^3J_{\text{HH}} = 10.6$  and 8.1 Hz, 0.31H), 5.21 (d,  $^3J_{\text{HH}} = 16.8$  Hz, 0.31H), 5.15-5.09 (m, 3H), 5.01 (d,  $^3J_{\text{HH}} = 10.0$  Hz, 0.69H), 3.71 (s, 4.14H), 3.70 (s, 1.86H), 2.78 (d,  $^3J_{\text{HH}} = 7.9$  Hz, 0.62H), 2.67-2.62 (m, 3.38H).

*E*-isomer:  $^{13}\text{C}$  NMR ( $\text{CDCl}_3$ ):  $\delta$  171.4, 136.8, 135.3, 132.4, 127.9, 119.5, 116.7, 58.0, 52.6, 37.3, 36.0.

*Z*-isomer:  $^{13}\text{C}$  NMR ( $\text{CDCl}_3$ ):  $\delta$  171.4, 133.1, 132.4, 131.9, 125.1, 119.6, 118.8, 58.0, 52.6, 37.2, 30.8.

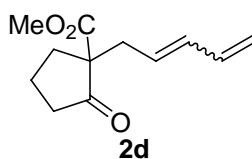

**Table 1, Entry 3.** The reaction was conducted for 24 h at 80 °C. Colorless oil. 76% yield, *E/Z* = 83/17.

$^1\text{H}$  NMR ( $\text{CDCl}_3$ ):  $\delta$  6.62 (dt,  $^3J_{\text{HH}} = 16.8$  and 10.6 Hz, 0.17H), 6.27 (dt,  $^3J_{\text{HH}} = 17.0$  and 10.4 Hz, 0.83H), 6.14-6.09 (m, 0.17H), 6.09 (dd,  $^3J_{\text{HH}} = 15.2$  and 10.5 Hz, 0.83H), 5.54 (dt,  $^3J_{\text{HH}} = 15.1$  and 7.4 Hz, 0.83H), 5.32 (dt,  $^3J_{\text{HH}} = 10.4$  and 7.9 Hz, 0.17H), 5.23 (d,  $^3J_{\text{HH}} = 16.8$  Hz, 0.17H), 5.17-5.15 (m, 0.17H), 5.13 (d,  $^3J_{\text{HH}} = 15.9$  Hz, 0.83H), 5.02 (d,  $^3J_{\text{HH}} = 10.1$  Hz, 0.83H), 3.70 (s, 2.49H), 3.69 (s, 0.51H), 2.83 (ddd,  $^2J_{\text{HH}} = 14.4$  Hz,  $^3J_{\text{HH}} =$

8.0 Hz, and  $^4J_{\text{HH}} = 1.2$  Hz, 0.17H), 2.69 (ddd,  $^2J_{\text{HH}} = 14.1$  Hz,  $^3J_{\text{HH}} = 7.4$  Hz, and  $^4J_{\text{HH}} = 1.1$  Hz, 0.83H), 2.53-2.36 (m, 3H), 2.26 (m, 1H), 2.03-1.87 (m, 3H).  $^{13}\text{C}$  NMR (*E*-isomer,  $\text{CDCl}_3$ ):  $\delta$  214.4, 171.3, 136.5, 135.1, 128.5, 116.5, 60.2, 52.5, 38.0, 36.6, 32.1, 19.5. HRMS (ESI) calcd for  $\text{C}_{12}\text{H}_{16}\text{O}_3\text{Na}$  ( $\text{M}+\text{Na}^+$ ) 231.0992, found 231.0990.

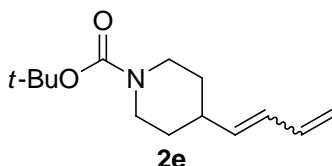

**Table 1, Entry 4.** The reaction was conducted for 24 h at 80 °C. Colorless oil. 81% yield (contaminated with ~5% impurity), *E/Z* = 85/15.

$^1\text{H}$  NMR ( $\text{CDCl}_3$ ):  $\delta$  6.63 (dt,  $^3J_{\text{HH}} = 17.0$  and 10.5 Hz, 0.15H), 6.29 (dt,  $^3J_{\text{HH}} = 17.0$  and 10.2 Hz, 0.85H), 6.04 (dd,  $^3J_{\text{HH}} = 15.4$  and 10.4 Hz, 0.85H), 5.95 (t,  $^3J_{\text{HH}} = 11.0$  Hz, 0.15H), 5.63 (dd,  $^3J_{\text{HH}} = 15.5$  and 6.7 Hz, 0.85H), 5.26 (t,  $^3J_{\text{HH}} = 10.0$  Hz, 0.15H), 5.21 (d,  $^3J_{\text{HH}} = 16.0$  Hz, 0.15H), 5.12 (d,  $^3J_{\text{HH}} = 15.7$  Hz, 0.85H), 5.11 (d,  $^3J_{\text{HH}} = 10.5$  Hz, 0.15H), 5.00 (d,  $^3J_{\text{HH}} = 10.1$  Hz, 0.85H), 4.08 (bs, 2H), 2.73 (bs, 2H), 2.64-2.53 (m, 0.15H), 2.20-2.11 (m, 0.85H), 1.69-1.58 (m, 2H), 1.45 (s, 9H), 1.33-1.25 (m, 2H).  $^{13}\text{C}$  NMR (*E*-isomer,  $\text{CDCl}_3$ ):  $\delta$  154.8, 138.6, 137.1, 132.0, 115.6, 79.3, 42.7, 38.8, 31.6, 28.4. HRMS (ESI) calcd for  $\text{C}_{14}\text{H}_{23}\text{NO}_2\text{Na}$  ( $\text{M}+\text{Na}^+$ ) 260.1621, found 260.1612.

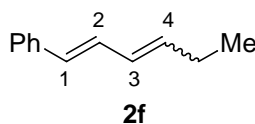

**Table 1, Entry 5.** (CAS 39491-62-8 for (1*E*,3*E*); 39491-61-7 for (1*E*,3*Z*)) The reaction was conducted for 36 h at 100 °C. Colorless oil. 73% yield, (1*E*,3*E*)/(1*E*,3*Z*) = 71/29.

*E*-isomer:  $^1\text{H}$  NMR ( $\text{CDCl}_3$ ):  $\delta$  7.37 (d,  $^3J_{\text{HH}} = 7.7$  Hz, 2H), 7.29 (t,  $^3J_{\text{HH}} = 7.8$  Hz, 2H), 7.19 (t,  $^3J_{\text{HH}} = 7.3$  Hz, 1H), 6.76 (dd,  $^3J_{\text{HH}} = 15.7$  and 10.3 Hz, 1H), 6.45 (d,  $^3J_{\text{HH}} = 15.7$  Hz, 1H), 6.21 (dd,  $^3J_{\text{HH}} = 15.1$  and 10.4 Hz, 1H), 5.67 (dt,  $^3J_{\text{HH}} = 15.1$  and 6.7 Hz, 1H), 2.17 (quint,  $^3J_{\text{HH}} = 7.1$  Hz, 2H), 1.05 (t,  $^3J_{\text{HH}} = 7.4$  Hz, 3H).

*Z*-isomer:  $^1\text{H}$  NMR ( $\text{CDCl}_3$ ):  $\delta$  7.41 (d,  $^3J_{\text{HH}} = 7.7$  Hz, 2H), 7.34-7.31 (m, 2H), 7.21 (t,  $^3J_{\text{HH}} = 7.5$  Hz, 1H), 7.04 (dd,  $^3J_{\text{HH}} = 15.7$  and 11.1 Hz, 1H), 6.52 (d,  $^3J_{\text{HH}} = 15.7$  Hz, 1H), 6.13 (t,  $^3J_{\text{HH}} = 10.8$  Hz, 1H), 5.53 (dt,  $^3J_{\text{HH}} = 10.6$  and 7.6 Hz, 1H), 2.17 (quint of d,  $^3J_{\text{HH}} = 7.6$  Hz and  $^4J_{\text{HH}} = 1.5$  Hz, 2H), 1.05 (t,  $^3J_{\text{HH}} = 7.4$  Hz, 3H).



$^{13}\text{C}$  NMR ( $\text{CDCl}_3$ ):  $\delta$  137.7, 137.4, 134.8, 131.2, 129.9, 129.53, 129.45, 128.54, 128.51, 128.1, 127.3, 127.0, 126.3, 126.1, 124.3, 25.9, 21.3, 14.3, 13.5.

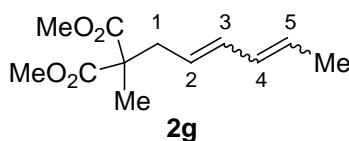

**Table 1, Entry 6.** (CAS 198876-11-3 for (2*E*,4*E*)) The reaction was conducted for 61 h at 100 °C. Colorless oil. 84% yield, (2*E*,4*E*)/(2*E*,4*Z*)/(2*Z*,4*E*)/(2*Z*,4*Z*) = 49/35/8/8.

$^1\text{H}$  NMR ( $\text{CDCl}_3$ ):  $\delta$  6.43-6.22 (m, 0.24H), 6.37 (dd,  $^3J_{\text{HH}}$  = 14.9 and 11.1 Hz, 0.35H), 6.09-5.92 (m, 1.41H), 5.71 (dq,  $^3J_{\text{HH}}$  = 15.2 and 7.1 Hz, 0.08H), 5.61 (dq,  $^3J_{\text{HH}}$  = 14.1 and 6.8 Hz, 0.49H), 5.60-5.54 (m, 0.08H), 5.49 (dt,  $^3J_{\text{HH}}$  = 15.0 and 7.6 Hz, 0.35H), 5.42 (dq,  $^3J_{\text{HH}}$  = 10.9 and 7.2 Hz, 0.35H), 5.37 (dt,  $^3J_{\text{HH}}$  = 13.9 and 7.7 Hz, 0.49H), 5.31 (dt,  $^3J_{\text{HH}}$  = 10.4 and 8.3 Hz, 0.08H), 5.14 (dt,  $^3J_{\text{HH}}$  = 10.4 and 8.3 Hz, 0.08H), 3.72-3.70 (m, 6H), 2.75 (d,  $^3J_{\text{HH}}$  = 7.4 Hz, 0.16H), 2.73 (d,  $^3J_{\text{HH}}$  = 7.4 Hz, 0.16H), 2.66 (d,  $^3J_{\text{HH}}$  = 7.6 Hz, 0.70H), 2.60 (d,  $^3J_{\text{HH}}$  = 7.6 Hz, 0.98H), 1.77-1.71 (m, 3H), 1.40 (s, 0.48H), 1.39 (s, 1.05H), 1.37 (s, 1.47H).  $^{13}\text{C}$  NMR (2*E* isomers,  $\text{CDCl}_3$ ):  $\delta$  172.58, 172.55, 134.9, 131.3, 129.8, 129.1, 128.9, 127.2, 125.9, 124.7, 54.12, 54.09, 52.68, 52.66, 39.5, 39.2, 20.14, 20.08, 18.2, 13.5.

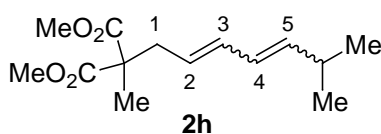

**Table 1, Entry 7.** The reaction was conducted for 72 h at 100 °C. Colorless oil. 87% yield, (2*E*,4*E*)/(2*E*,4*Z*)/(2*Z*,4*E*) = 84/9/7.

$^1\text{H}$  NMR ( $\text{CDCl}_3$ ):  $\delta$  6.35 (dd,  $^3J_{\text{HH}}$  = 15.4 and 11.6 Hz, 0.09H), 6.23 (dd,  $^3J_{\text{HH}}$  = 15.3 and 11.1 Hz, 0.07H), 6.09-6.04 (m, 0.09 H), 6.03 (dd,  $^3J_{\text{HH}}$  = 15.0 and 10.4 Hz, 0.84H), 5.93 (dd,  $^3J_{\text{HH}}$  = 15.3 and 10.4 Hz, 0.84H), 5.80 (t,  $^3J_{\text{HH}}$  = 10.9 Hz, 0.07H), 5.67 (dd,  $^3J_{\text{HH}}$  = 14.9 and 6.3 Hz, 0.07H), 5.58 (dd,  $^3J_{\text{HH}}$  = 15.1 and 6.6 Hz, 0.84H), 5.49 (dt,  $^3J_{\text{HH}}$  = 15.3 and 6.9 Hz, 0.09H), 5.40 (dt,  $^3J_{\text{HH}}$  = 14.9 and 7.5 Hz, 0.84H), 5.18 (t,  $^3J_{\text{HH}}$  = 10.0 Hz, 0.09H), 5.16 (dt,  $^3J_{\text{HH}}$  = 10.8 and 7.9 Hz, 0.07H), 3.71 (s, 5.58H), 3.70 (s, 0.42H), 2.75 (d,  $^3J_{\text{HH}}$  = 7.9 Hz, 0.18H), 2.65 (d,  $^3J_{\text{HH}}$  = 7.5 Hz, 0.14H), 2.61 (d,  $^3J_{\text{HH}}$  = 7.6 Hz, 1.68H), 2.36-2.25 (m 1H), 1.41 (s, 0.27H), 1.39 (s, 0.21H), 1.38 (s, 2.52H), 1.00 (d,  $^3J_{\text{HH}}$  = 6.8 Hz,

0.42H), 0.98 (d,  $^3J_{\text{HH}} = 6.8$  Hz, 5.04H), 0.96 (d,  $^3J_{\text{HH}} = 6.7$  Hz, 0.54H).  $^{13}\text{C}$  NMR ((*2E,4E*)-isomer,  $\text{CDCl}_3$ ):  $\delta$  172.4, 141.2, 134.9, 126.8, 124.9, 53.9, 52.5, 39.0, 30.9, 22.2, 19.9. HRMS (ESI) calcd for  $\text{C}_{14}\text{H}_{22}\text{O}_4\text{Na}$  ( $\text{M}+\text{Na}^+$ ) 277.1410, found 277.1400.

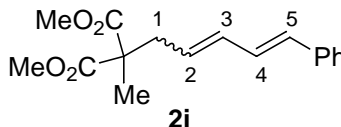

**Table 1, Entry 8.** (CAS 148876-13-5 for (*2E,4E*); 148876-21-5 for (*2Z,4E*)) The reaction was conducted for 48 h at 100 °C. Colorless oil. 83% yield, (*2E,4E*)/(*2Z,4E*) = 81/19.

(*2E,4E*)-isomer:  $^1\text{H}$  NMR ( $\text{CDCl}_3$ ):  $\delta$  7.37 (d,  $^3J_{\text{HH}} = 7.2$  Hz, 2H), 7.30 (t,  $^3J_{\text{HH}} = 7.7$  Hz, 2H), 7.21 (t,  $^3J_{\text{HH}} = 7.3$  Hz, 1H), 6.73 (dd,  $^3J_{\text{HH}} = 15.6$  and 10.5 Hz, 1H), 6.48 (d,  $^3J_{\text{HH}} = 15.6$  Hz, 1H), 6.27 (dd,  $^3J_{\text{HH}} = 15.0$  and 10.5 Hz, 1H), 5.67 (dt,  $^3J_{\text{HH}} = 15.0$  and 7.5 Hz, 1H), 3.74 (s, 6H), 2.70 (d,  $^3J_{\text{HH}} = 7.7$  Hz, 2H), 1.43 (s, 3H).  $^{13}\text{C}$  NMR ( $\text{CDCl}_3$ ):  $\delta$  172.3, 137.2, 134.7, 131.7, 128.6, 128.3, 127.7, 126.4, 126.3, 53.9, 52.5, 39.3, 20.0.

(*2Z,4E*)-isomer:  $^1\text{H}$  NMR ( $\text{CDCl}_3$ ):  $\delta$  7.42 (d,  $^3J_{\text{HH}} = 7.1$  Hz, 2H), 7.32 (t,  $^3J_{\text{HH}} = 7.4$  Hz, 2H), 7.21 (t,  $^3J_{\text{HH}} = 7.4$  Hz, 1H), 7.04 (dd,  $^3J_{\text{HH}} = 16.6$  and 11.1 Hz, 1H), 6.56 (d,  $^3J_{\text{HH}} = 15.5$  Hz, 1H), 6.30 (t,  $^3J_{\text{HH}} = 10.9$  Hz, 1H), 5.40 (dt,  $^3J_{\text{HH}} = 9.5$  and 8.0 Hz, 1H), 3.71 (s, 6H), 2.88 (d,  $^3J_{\text{HH}} = 8.0$  Hz, 2H), 1.46 (s, 3H).  $^{13}\text{C}$  NMR ( $\text{CDCl}_3$ ):  $\delta$  172.3, 137.2, 133.7, 132.5, 128.6, 127.7, 125.3, 123.6, 53.9, 52.6, 33.9, 19.9.

### Procedure for Equation 3.

A solution of  $[\text{RhCl}(\text{cod})]_2$  (2.5 mg, 10  $\mu\text{mol}$  Rh) and ( $\pm$ )-binap (6.8 mg, 11  $\mu\text{mol}$ ) in 1,2-dichloroethane (0.3 mL) was stirred for 10 min at room temperature. Dipole **3** (10.5 mg, 60  $\mu\text{mol}$ ) and alkyne **1a** (42.5 mg, 0.20 mmol) were added to it with additional 1,2-dichloroethane (0.3 mL), and the mixture was stirred for 43 h at 80 °C. After cooled to room temperature, the reaction mixture was directly passed through a pad of silica gel with EtOAc, and the solvent was removed under vacuum. The residue was purified by silica gel preparative TLC with  $\text{Et}_2\text{O}$ /hexane = 1/5 to afford compound **2a** as a colorless oil (37.0 mg, 0.174 mmol; 87% yield, *E/Z* = 76/24).

### Procedure for Equation 4.

A solution of  $\text{RhH}(\text{PPh}_3)_4$  (18.5 mg, 16.0  $\mu\text{mol}$  Rh) and alkyne **1a** (42.5 mg, 0.20 mmol) in 1,2-dichloroethane (0.6 mL) was stirred for 76 h at 100 °C using a teflon-

sealed Schlenk tube. After cooled to room temperature, the reaction mixture was directly passed through a pad of silica gel with EtOAc, and the solvent was removed under vacuum. The residue was chromatographed on silica gel with Et<sub>2</sub>O/hexane = 1/5 to afford compound **2a** as a pale yellow oil (34.3 mg, 0.161 mmol; 81% yield, *E/Z* = 78/22).

#### Procedure for Equation 5.

A solution of [RhCl(cod)]<sub>2</sub> (2.5 mg, 10 μmol Rh) and (±)-binap (6.8 mg, 11 μmol) in 1,2-dichloroethane (0.3 mL) was stirred for 10 min at room temperature. Dipole **3** (34.8 mg, 0.20 mmol) and alkyne **1j** (59.3 mg, 0.20 mmol) were added to it with additional 1,2-dichloroethane (0.3 mL), and the mixture was stirred for 63 h at 100 °C. After cooled to room temperature, the reaction mixture was directly passed through a pad of silica gel with EtOAc, and the solvent was removed under vacuum. The residue was purified by silica gel preparative TLC with Et<sub>2</sub>O/hexane = 1/2 to afford compound **4** with diene **2j** (**4/2j** = 96/4) as a colorless oil (46.0 mg, 0.155 mmol; 75% yield of **4**, mixture of two diastereomers in 69/31).

<sup>1</sup>H NMR (CDCl<sub>3</sub>): δ 5.77 (d, <sup>3</sup>*J*<sub>HH</sub> = 9.9 Hz, 0.69H), 5.72-5.65 (m, 0.62H), 5.63 (ddd, <sup>3</sup>*J*<sub>HH</sub> = 9.9, 6.3, and 3.1 Hz, 0.69H), 3.73 (s, 0.93H), 3.72 (s, 2.07H), 3.714 (s, 2.07H), 3.707 (s, 0.93H), 3.70 (s, 2.07H), 3.69 (s, 0.93H), 2.64-2.35 (m, 5H), 2.28-2.10 (m, 1.38H), 2.08 (dd, <sup>2</sup>*J*<sub>HH</sub> = 14.2 Hz and <sup>3</sup>*J*<sub>HH</sub> = 5.3 Hz, 0.31H), 1.94 (dd, <sup>2</sup>*J*<sub>HH</sub> = 13.2 Hz and <sup>3</sup>*J*<sub>HH</sub> = 10.6 Hz, 0.31H), 1.87 (t, *J*<sub>HH</sub> = 12.3 Hz, 0.69H), 1.79-1.72 (m, 0.62H), 1.73 (t, *J*<sub>HH</sub> = 12.7 Hz, 0.69H). HRMS (ESI) calcd for C<sub>15</sub>H<sub>21</sub>O<sub>6</sub> (M+H<sup>+</sup>) 297.1333, found 297.1329.

Major diastereomer: <sup>13</sup>C NMR (CDCl<sub>3</sub>): δ 175.2, 173.2, 172.9, 127.9, 126.7, 58.2, 52.97, 52.96, 51.8, 44.9, 44.7, 43.6, 38.5, 37.9, 29.7.

Minor diastereomer: <sup>13</sup>C NMR (CDCl<sub>3</sub>): δ 175.9, 173.0, 172.7, 128.7, 125.2, 59.4, 53.0, 52.9, 51.9, 43.6, 42.1, 40.2, 38.5, 38.4, 27.1.
